# Supplementary material for: Regional Homogeneity Brain Alterations in Schizophrenia: An Activation Likelihood Estimation Meta-Analysis
Source: PubMed Central journal article supplement — Psychiatry Investig. 2021 Aug 2;18(8):709–17. doi: 10.30773/pi.2021.0062 (PMC8390947; doi:10.30773/pi.2021.0062), 2021-08-02
Supplement: pi-2021-0062-suppl1.pdf [file pi-2021-0062-suppl1.pdf]

**Supplementary Table 1.** Search terms for the systematic literature search

| Database       | Search terms                                                                                                                                                                                                                                                                                                                                                                                                                                                                                                                                                                                             |
|----------------|----------------------------------------------------------------------------------------------------------------------------------------------------------------------------------------------------------------------------------------------------------------------------------------------------------------------------------------------------------------------------------------------------------------------------------------------------------------------------------------------------------------------------------------------------------------------------------------------------------|
| PubMed         | All Fields: "schizophrenia"[MeSHTerms] OR "Schizophrenias"[Title/Abstract] OR "Schizophrenic disorders"[Title/Abstract] OR "disorder schizophrenic"[Title/Abstract] OR "disorders schizophrenic"[Title/Abstract] OR "Schizophrenic Disorder"[Title/Abstract]) OR "Dementia Praecox"[Title/Abstract] OR "schizophr*" [Title/Abstract];AND"ReHo"[Title/Abstract] OR "Regional homogeneity"[Title/Abstract]) OR "local consistency"[Title/Abstract] OR "coherence"[Title/Abstract]; AND"functional magnetic resonance imaging"[Title/Abstract] OR "fMRI"[Title/Abstract] OR "resting state"[Title/Abstract] |
| Web of Science | Same as Pubmed                                                                                                                                                                                                                                                                                                                                                                                                                                                                                                                                                                                           |
| Embase         | Same as Pubmed                                                                                                                                                                                                                                                                                                                                                                                                                                                                                                                                                                                           |
| Cochranne      | Same as Pubmed                                                                                                                                                                                                                                                                                                                                                                                                                                                                                                                                                                                           |
