# Supplementary material for: Regional Homogeneity Brain Alterations in Schizophrenia: An Activation Likelihood Estimation Meta-Analysis
Source: PubMed Central journal article supplement — Psychiatry Investig. 2021 Aug 2;18(8):709–17. doi: 10.30773/pi.2021.0062 (PMC8390947; doi:10.30773/pi.2021.0062), 2021-08-02
Supplement: pi-2021-0062-suppl2.pdf [file pi-2021-0062-suppl2.pdf]

**Supplementary Table 2.** Quality assessment checklist (score 0/0.5/1 per item; total score out of 10)\*

---

Category 1: Participants

1. Patients were evaluated prospectively, specific diagnostic criteria were applied, and demographic data were reported.
2. Healthy comparison participants were evaluated prospectively, psychiatric and medical illnesses were excluded.
3. Important variables (e.g., age, sex, illness duration, onset, medication status, comorbidity, severity of illness) were checked either by stratification or statistically.
4. Sample size per group >10.

Category 2: Methods for image acquisition and analysis

5. Whole brain analysis was automated with no a priori regional selection.
6. Coordinates reported in a standard space.
7. The imaging technique used was clearly described so that it could be reproduced.
8. Measurements were clearly described so that they could be reproduced.

Category 3: Results and conclusions

9. Statistical parameters for significant and important nonsignificant differences were provided.
  10. Conclusions were consistent with the results obtained and the limitations were discussed.
- 

\*When criteria were partially met, 0.5 points were awarded
